# Supplementary material
Source: PubMed Central journal article supplement (PMC2863033)
Supplement: NIHMS191231-supplement-1_si_001.pdf [file NIHMS191231-supplement-1_si_001.pdf]

## Supporting Information: Irreversible Inhibition of DNA Polymerase $\beta$ by an Oxidized Abasic Lesion.

Lirui Guan and Marc M. Greenberg\*

Department of Chemistry, Johns Hopkins University, 3400 N. Charles St., Baltimore, MD 21218

[mgreenberg@jhu.edu](mailto:mgreenberg@jhu.edu)

### Contents:

1. General Methods (S1-S2)
2. Experimental Procedures. (S2-S7)
3. **Supporting Information Figure 1.**  $^1\text{H}$  NMR spectrum of **S2**. (S8)
4. **Supporting Information Figure 2.**  $^1\text{H}$  NMR spectrum of **S3**. (S9)
5. **Supporting Information Figure 3.**  $^1\text{H}$  NMR spectrum of **S4**. (S10)
6. **Supporting Information Figure 4.**  $^{31}\text{P}$  NMR spectrum of **S4**. (S11)
7. **Supporting Information Figure 5.** ESI-MS of oligonucleotide **S6** (S12)
8. **Supporting Information Figure 6.** Active site titration plot of Pol  $\beta$ . (S13)
9. **Supporting Information Figure 7.** Kinetic plot #1 of irreversible inhibition of Pol  $\beta$  by DOB. (S14)
10. **Supporting Information Figure 8.** Kinetic plot #2 of irreversible inhibition of Pol  $\beta$  by DOB. (S15)
11. **Supporting Information Figure 9.** Kinetic plot #3 of irreversible inhibition of Pol  $\beta$  by DOB. (S16)
12. **Supporting Information Figure 10.** Kinetic plot #4 of irreversible inhibition of Pol  $\beta$  by DOB. (S17)
13. **Supporting Information Figure 11.** Kinetic plot #5 of irreversible inhibition of Pol  $\beta$  by DOB. (S18)
14. **Supporting Information Table 1.** Summary of individual kinetic analyses of irreversible inhibition of Pol  $\beta$  by DOB (**1**). (S19)
15. **Supporting Information Figure 12.** Time course experiment of Pol  $\beta$  lyase reaction with **1** and **2**. (S19)
16. **Supporting Information Figure 13.** Demonstration of completeness of UDG preparation of **1**. (S20)

**General Methods.** Oligonucleotides were synthesized on an Applied Biosystems Incorporated 394 oligonucleotide synthesizer. Oligonucleotide synthesis reagents were purchased from Glen Research (Sterling, VA). All chemicals were purchased from either Sigma-Aldrich or Acros and were used without further purification. ESI-MS analysis was carried out on a LCQ-Deca Ion Trap. All Oligonucleotides were precipitated from 1.25 M ammonium

acetate (pH 5.6) prior to MS analysis.  $\text{NaB}^3\text{H}_4$  was from Perkin Elmer. Terminal deoxytransferase and uracil-DNA glycosylase were obtained from New England Biolabs.  $\alpha\text{-}^{32}\text{P}$ -cordycepin 5'-triphosphate was purchased from Perkin Elmer.  $\text{C}_{18}$ -Sep-Pak cartridges were obtained from Waters. Quantification of radiolabeled oligonucleotides was carried out using a Molecular Dynamics Phosphorimager 840 equipped with ImageQuant Version 5.1 software. All photolyses of oligonucleotide were carried out in clear eppendorf tubes in a Rayonet photoreactor (RPR-100) fitted with 16 lamps having an output maximum at 350 nm. In all experiments

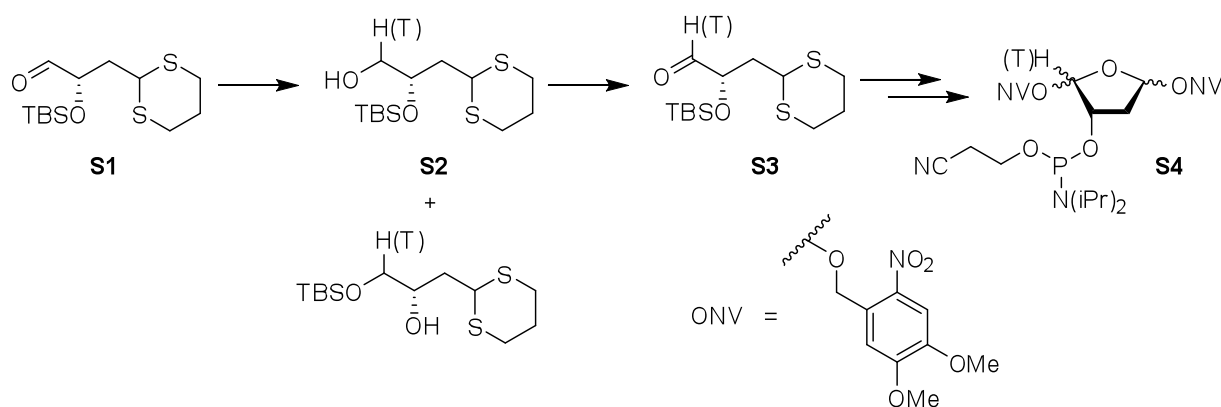

**Phosphoramidite S4.** The tritium labeled DOB precursor **S4** was synthesized from compound **S3** using established methods.<sup>1</sup> The  $^1\text{H}$  NMR ( $\text{CDCl}_3$ ) and  $^{31}\text{P}$  NMR ( $\text{CDCl}_3$ ) of **S4** matches previously reported data.<sup>1</sup> The synthesis of **S3** is described below.

**Compound S2.** MeOH was refluxed with  $\text{NaBH}_4$  while gently bubbling argon through it for 24 h at 30 °C. Sodium was then added and the solution was refluxed for another 24 h. MeOH was distilled and kept over 4 Å molecular sieves. Compound **S1**<sup>1</sup> (200 mg, 0.645 mmol) in distilled MeOH (2 mL) was added to  $\text{NaB}^3\text{H}_4$  (8.2 Ci/mmol, 100 mCi). After stirring at 25 °C for 1 h.  $\text{NaBH}_4$  (30 mg, 0.8 mmol) was added. The resulting mixture was stirred at the same

temperature for 0.5 h. The reaction mixture was diluted with diethyl ether and washed with saturated  $\text{NH}_4\text{Cl}$ , followed by brine. The organic phase was dried over  $\text{Na}_2\text{SO}_4$  and the solvent was removed under reduced pressure. The residue was purified by column chromatography (EtOAc : hexanes = 1 : 4) to give **S2** as a 1:1 mixture of two isomers (192 mg, 95% total). The mixture contained 50 % desired product and 50 % undesired product with silyl migration to the primary alcohol.  $^1\text{H NMR}$  ( $\text{CDCl}_3$ )  $\delta$  0.08-0.15 (3s, 6H), 0.91-0.92 (2s, 12H), 1.78-2.05 and 2.47 (m, 4H), 2.12 (m, 1H), 2.86 (m, 4H), 3.46 (m, 1H), 3.63 (m, 1H), 3.98 and 4.31 (m, 1H), 4.07 (m, 1H).

**Compound S3.** The mixture of **S2** (192 mg, 0.623 mmol), Dess-Martin periodinane (396 mg, 0.94 mmol), and anhydrous  $\text{K}_2\text{CO}_3$  (138 mg, 1 mmol) in  $\text{CH}_2\text{Cl}_2$  (6 mL) was stirred at 25 °C for 30 min. A mixture of saturated  $\text{Na}_2\text{S}_2\text{O}_3$  and saturated  $\text{NaHCO}_3$  (1:4) was added to the reaction mixture and stirred vigorously for 5 min. The organic phase was washed with saturated  $\text{NaHCO}_3$ , followed by brine and dried over  $\text{Na}_2\text{SO}_4$ . The solvent was removed under reduced pressure and the residue was purified by column chromatography (EtOAc : hexanes = 1 : 6) to give **S3** (91.8 mg, 48%, 554 Bq/nmol).  $^1\text{H NMR}$  ( $\text{CDCl}_3$ )  $\delta$  0.11 (s, 6H), 0.95 (s, 12H), 1.97-2.08 (m, 2H), 2.21 (m, 2H), 2.77-2.80 (m, 6H), 4.08 (m, 1H), 4.26 (m, 1H), 9.68 (s, 1H).

5'-d(XTG TGT GGA GCT GTG GCG G)

**S5**

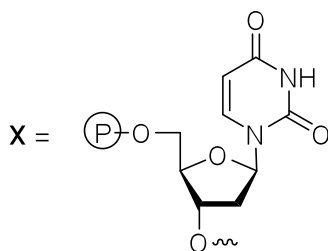

**Synthesis of Oligonucleotide S5 containing AP Lesion Precursor.** Standard synthesis cycles (25 s coupling, 5 s capping with acetic anhydride, 15 s oxidation with 1 M iodine in THF, 95 s detritylation with 3% TCA in methylene chloride) were used to incorporate phosphoramidites including all four native phosphoramidites, 2'-deoxyuridine phosphoramidite and the chemical phosphorylation reagent (Glen Research). After AMA (conc. aq. ammonia : methylamine v/v 1:1) deprotection (65 °C, 10 min), the oligonucleotide was purified by 20% denaturing PAGE.

5'-d(XTC GTA ATG CAG TCT )

**S6**

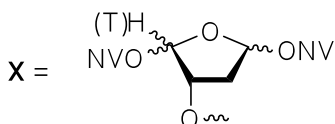

**Synthesis of Oligonucleotide (S6) Containing DOB Lesion Precursor.** Standard synthesis cycles (25 s coupling, 5 s capping with acetic anhydride, 15 s oxidation with 0.1 M iodine in THF, 95 s detritylation with 3% TCA in methylene chloride) were used prior to incorporating the lesion precursor. The phosphoramidite of the tritium labeled lesion (**S4**) was incorporated manually with 5 min coupling, 25 s capping, 40 s oxidation using the same synthesis reagents. After AMA (conc. aq. ammonia : methylamine v/v 1:1) deprotection (65 °C, 10 min), the oligonucleotide was purified by 20% denaturing PAGE.

5'-d(TAA TGG CTA ACG CAA XTC GTA ATG CAG TCT )

3'-d(ATT ACC GAT TGC GTT    AAG CAT TAC GTC AGA)

**S7**

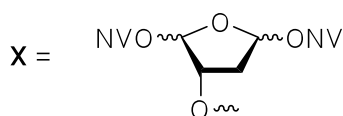

**The preparation of ternary complex 1.** Freshly hybridized ternary complex  $3^{1-32}\text{P-S7}$  (2  $\mu\text{M}$ ) in HEPES buffer (50 mM, 100 mM NaCl, pH 7.2) was photolyzed for 60 min at 25 °C. The resulting solution of **1** was used immediately. Passage of the photolyzed ternary complex through Sephadex G-25 prior to incubation with Pol  $\beta$  had not effect on inhibition.

5'-d(CCC CGA CCG GCT CGT ATG **X**TG TGT GGA GCT GTG GCG G)  
 3'-d(GGG GCT GGC CGA GCA TAC   AAC ACA CCT CGA CAC CGC C)

**S8**

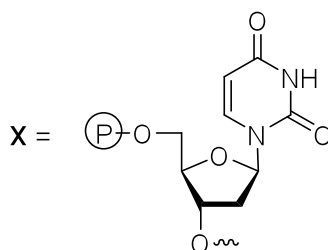

**The preparation of ternary complex 2.** The hybridized ternary complex  $3^{1-32}\text{P-S8}$  (1  $\mu\text{M}$ ) was incubated with uracil-DNA glycosylase (UDG) (155 units) in UDG reaction buffer (100  $\mu\text{L}$ , 20 mM Tris-HCl, pH 8.0, 1 mM DTT, 1 mM EDTA) at 37 °C for 10 min. The resulting solution of **2** was used immediately without further purification.

**Pol  $\beta$  active site titration essay.** Freshly prepared ternary  $3^{1-32}\text{P-2}$  (500 nM) was incubated with Pol  $\beta$  (5 nM, 10 nM and 15 nM) in HEPES buffer (50 mM, pH 7.4, containing 5 mM  $\text{MgCl}_2$ ) at 25 °C for 20 min. Aliquots (5  $\mu\text{L}$ ) was removed at the indicated time and quenched with  $\text{NaBH}_4$  (2  $\mu\text{L}$ , 500 mM) at 25 °C. for 1 h. The samples were mixed with formamide loading buffer (15  $\mu\text{L}$ , 90%, 10 mM EDTA). An aliquot of the mixture (5  $\mu\text{L}$ ) was loaded on to a 20% denaturing polyacrylamide gel and the product was analyzed using a phosphorimager. The amount of product versus time was fit using the equation:  $y = A_0 \cdot (1 - \exp(-a \cdot x)) + b \cdot x$ . The percentage of active Pol  $\beta$  ( $48.3 \pm 3.8$  %) was calculated from  $A_0/[\text{Pol } \beta]$ .

**Pol  $\beta$  lyase reaction with 1 and 2.** The freshly prepared ternary complex  $3^{1-32}\text{P-1}$  or  $3^{1-32}\text{P-2}$

(200 nM) was incubated with Pol  $\beta$  (5 nM) in HEPES buffer (200  $\mu$ L, 50 mM, pH 7.4, containing 5 mM MgCl<sub>2</sub>) at 37 °C. Aliquots (5  $\mu$ L) were removed at the indicated times and quenched with NaBH<sub>4</sub> (2  $\mu$ L, 500 mM) at 25 °C for 1 h. The samples were mixed with formamide loading buffer (15  $\mu$ L, 90%, 10 mM EDTA). An aliquot of the mixture (5  $\mu$ L) was loaded on to a 20% denaturing polyacrylamide gel and the product was analyzed using a phosphorimager.

**Stepwise Inhibition of Pol  $\beta$  lyase reaction by DOB.** Freshly prepared ternary complex 3'-<sup>32</sup>P-1 (200 nM) was incubated with Pol  $\beta$  (5 nM) in HEPES buffer (200  $\mu$ L, 50 mM, pH 7.4, containing 5 mM MgCl<sub>2</sub>) at 37 °C. Aliquots (5  $\mu$ L) were removed at the indicated times and quenched with NaBH<sub>4</sub> (2  $\mu$ L, 500 mM) at 25 °C for 1 h. After 10 min, Pol  $\beta$  (10  $\mu$ L, 100 nM, 1 pmol) was added to the solution. Aliquots (5  $\mu$ L) were removed at the indicated times and quenched with NaBH<sub>4</sub>. After another 10 min, Pol  $\beta$  (10  $\mu$ L, 100 nM, 1 pmol) was added to the solution. Aliquots (5  $\mu$ L) were removed at the indicated times and quenched with NaBH<sub>4</sub>. The samples were mixed with formamide loading buffer (15  $\mu$ L, 90%, 10 mM EDTA). An aliquot of the mixture (5  $\mu$ L) was loaded on to a 20% denaturing polyacrylamide gel and the product was analyzed using a phosphorimager.

**Measurement of IC<sub>50</sub> of DOB.** Freshly prepared ternary complex **1** (0, 10 nM, 20 nM, 40 nM, 60 nM, 100 nM, 200 nM, 400 nM, 600 nM, 1  $\mu$ M) was incubated with Pol  $\beta$  (50 nM) in HEPES buffer (40  $\mu$ L, 50 mM, pH 7.4, containing 5 mM MgCl<sub>2</sub>) at 25 °C for 3 min. Aliquots (5  $\mu$ L) were added to 3'-<sup>32</sup>P-2 in HEPES buffer (95  $\mu$ L, 50 mM, pH 7.4, containing 5 mM MgCl<sub>2</sub>). The resulting solutions (100  $\mu$ L, Pol  $\beta$ : 2.5 nM; 3'-<sup>32</sup>P-2: 100 nM; **1**: 0, 0.5 nM, 1 nM, 2 nM, 3 nM, 5 nM, 10 nM, 20 nM, 30 nM, 50 nM) were incubated at 37 °C for 10 min. After 10 min, the solution was quenched with NaBH<sub>4</sub> (10  $\mu$ L, 500 mM) at 25 °C for 1 h. An aliquot of the reaction

solution (1  $\mu\text{L}$ ) was mixed with formamide loading buffer (4  $\mu\text{L}$ , 90%, 10 mM EDTA) and loaded on to a 20% denaturing polyacrylamide gel. The product was analyzed using a phosphorimager.

**Time-dependent irreversible inhibition kinetics of Pol  $\beta$ .** Freshly prepared ternary complex **1** with various concentrations (0 nM, 7.5 nM, 15 nM, 30 nM, 45 nM, 60 nM) were incubated with  $3'$ - $^{32}\text{P}$ -**2** (500 nM) and Pol  $\beta$  (7.5 nM) in HEPES buffer (100  $\mu\text{L}$ , 50 mM, pH 7.4, containing 5 mM  $\text{MgCl}_2$ ) at 37  $^\circ\text{C}$ . Aliquots (10  $\mu\text{L}$ ) were removed at the indicated times and quenched with  $\text{NaBH}_4$  (2  $\mu\text{L}$ , 500 mM) at 25  $^\circ\text{C}$  for 1 h. The samples were mixed with formamide loading buffer (20  $\mu\text{L}$ , 90%, 10 mM EDTA). An aliquot of the mixture (5  $\mu\text{L}$ ) was loaded on to a 20% denaturing polyacrylamide gel and the product was analyzed using a phosphorimager.

**Phenol extraction assay.** Ternary complex  $^3\text{H}$ -**1**,  $3'$ - $^{32}\text{P}$ -**1** or  $3'$ - $^{32}\text{P}$ -**2** (125 nM) was incubated with Pol  $\beta$  (1.25  $\mu\text{M}$ ) or BSA (0.8  $\mu\text{M}$ ) in HEPES buffer (200  $\mu\text{L}$ , 50 mM, pH 7.4, containing 5 mM  $\text{MgCl}_2$ ) at 37  $^\circ\text{C}$  for 2 h. Calf thymus DNA (1  $\mu\text{L}$ , 10  $\mu\text{g}$ ) was then added and the resulting solution was incubated at 37  $^\circ\text{C}$  for 15 min. The solution was extracted with buffer-saturated (Tris-HCl, pH 7.5) phenol (200  $\mu\text{L}$ ) three times. The phenol layers were combined. The phenol layer and aqueous layer were mixed separately with liquid scintillation cocktail (16 mL) and the  $^3\text{H}$  or  $^{32}\text{P}$  in each sample was counted using a liquid scintillation counter.

1. Kodama, T.; Greenberg, M. M. *J. Org. Chem.* **2005**, *70*, 9916-9924.

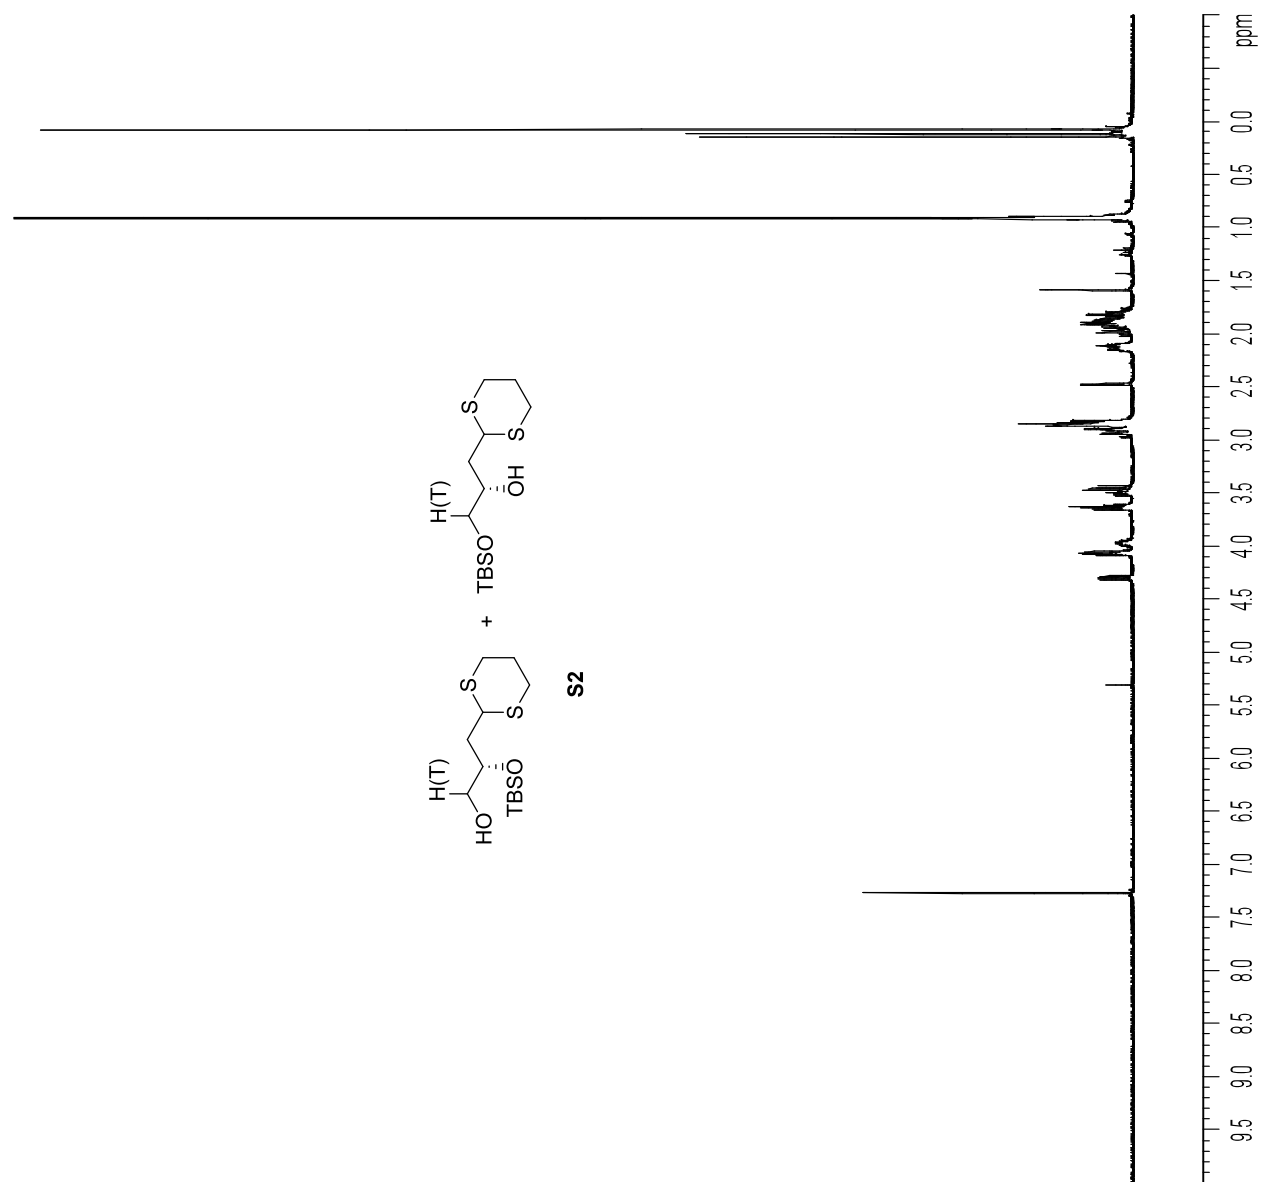

Supporting Information Figure 1.  $^1\text{H}$  NMR spectrum of S2.



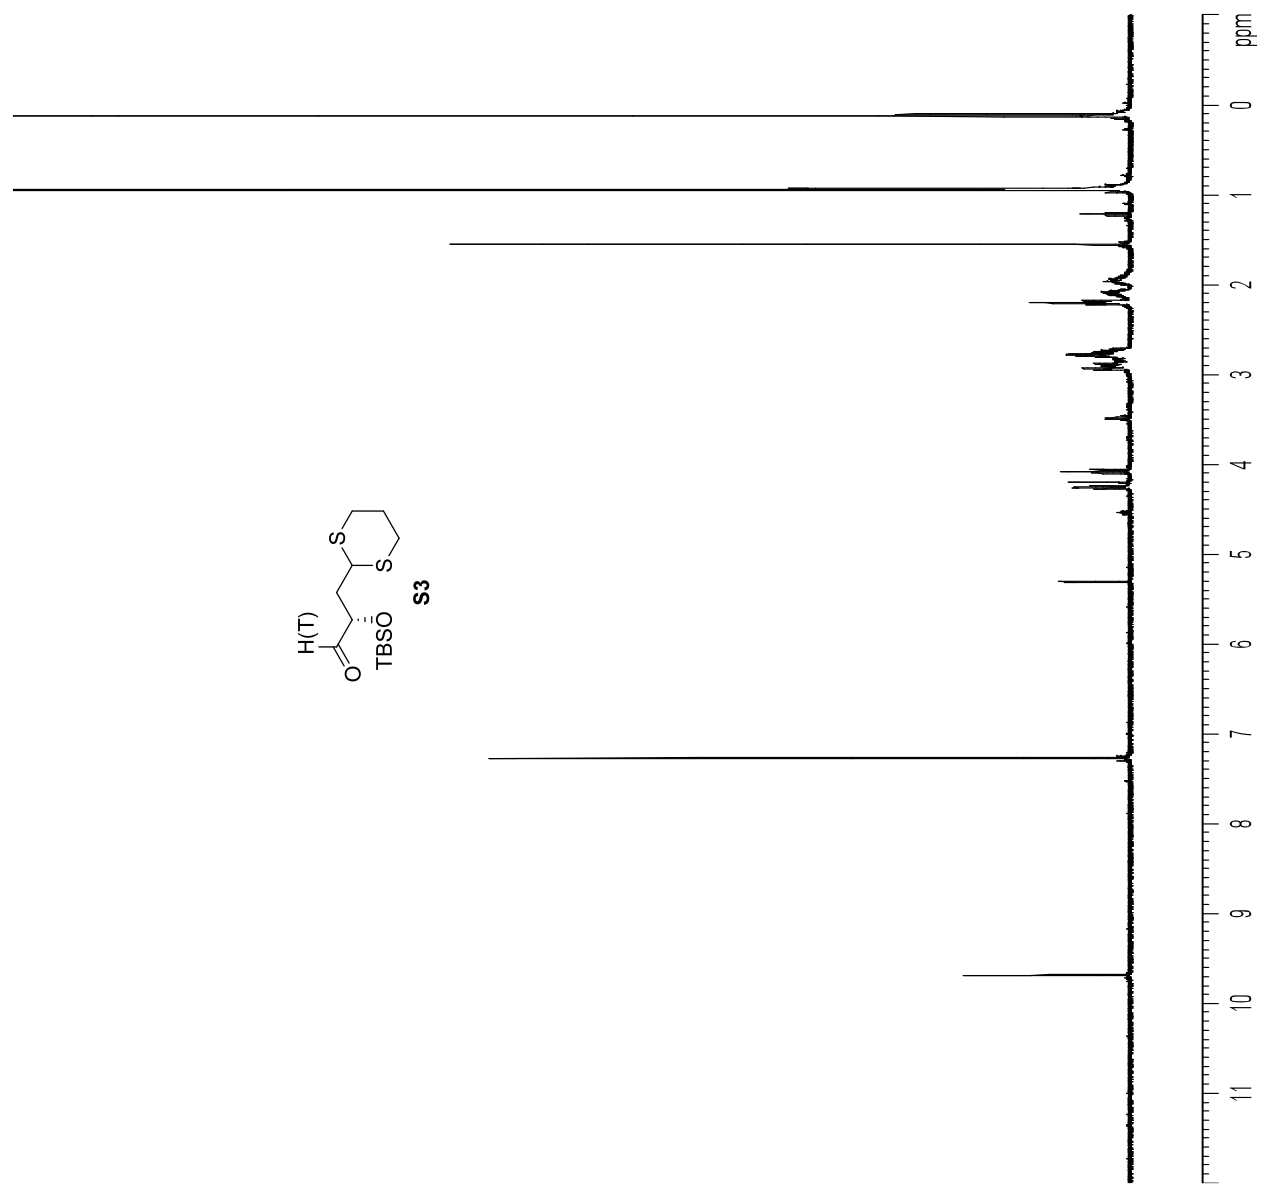

Supporting Information Figure 2.  $^1\text{H}$  NMR spectrum of S3.

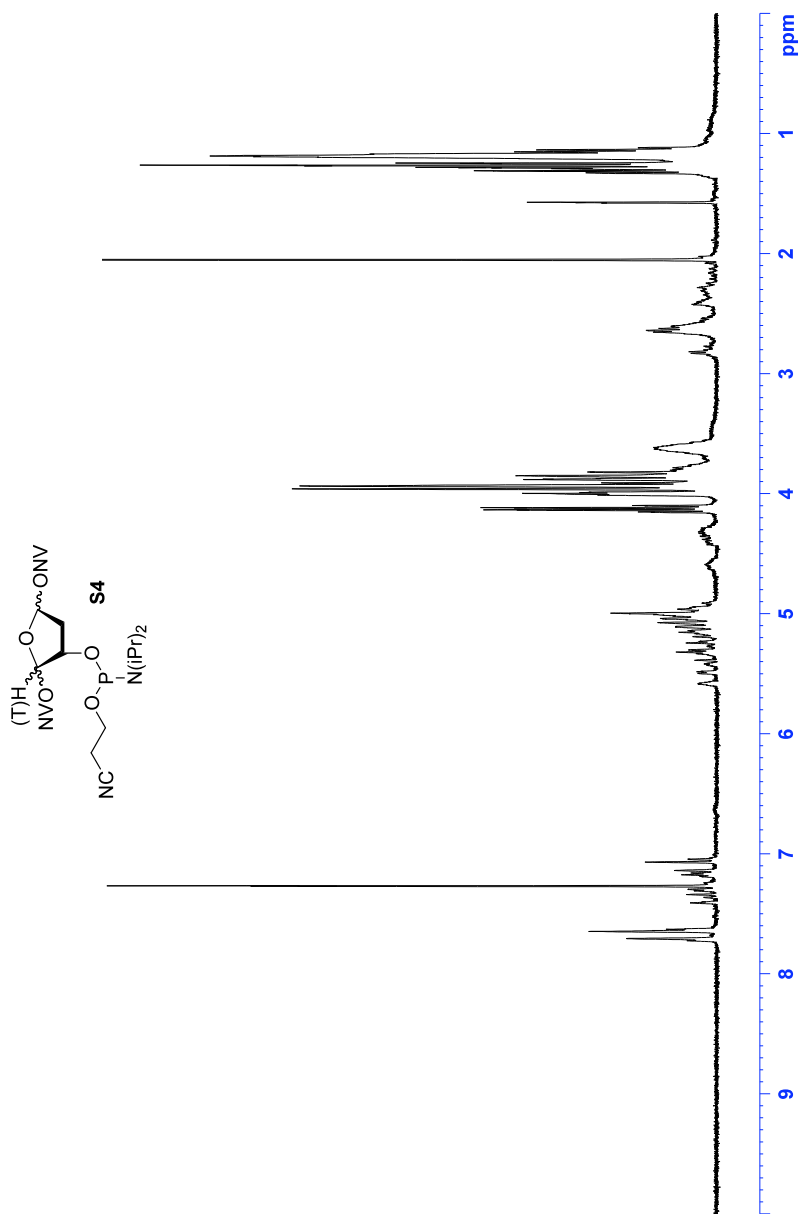

Supporting Information Figure 3. <sup>1</sup>H NMR spectrum of S4.

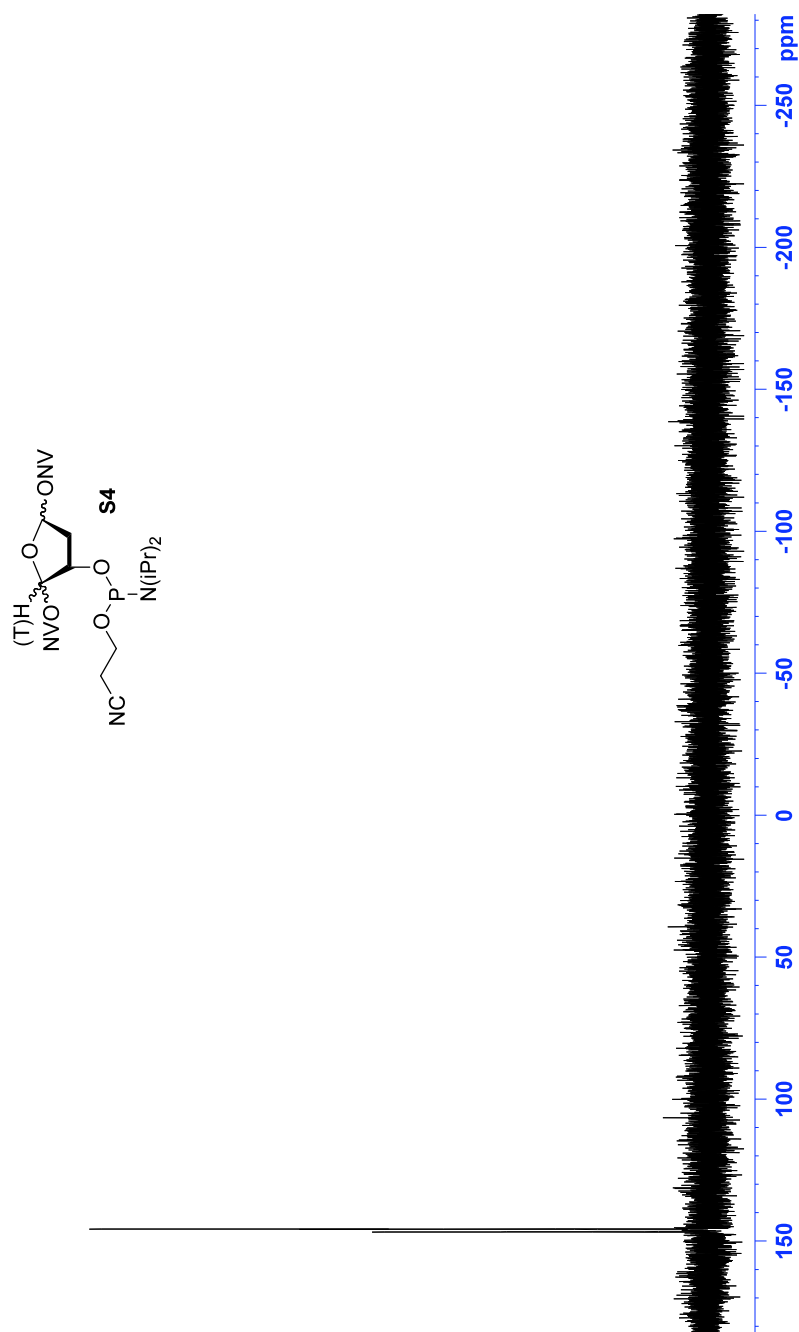

Supporting Information Figure 4.  $^{31}\text{P}$  NMR spectrum of S4.

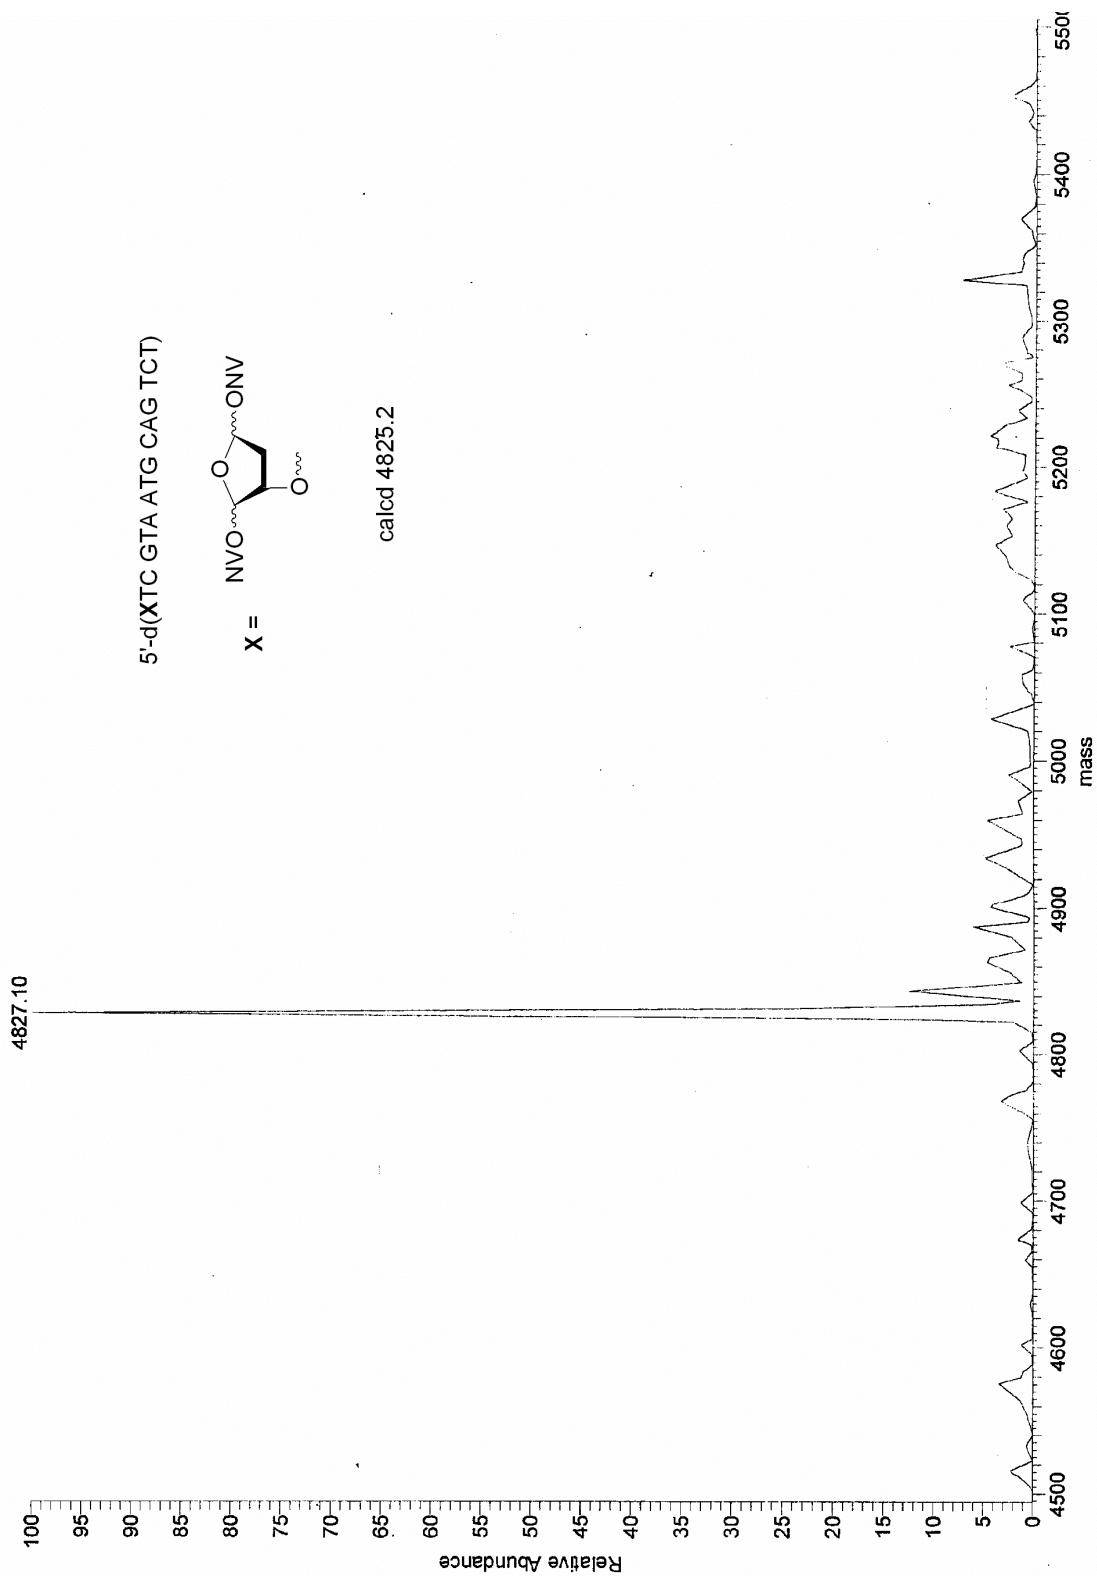

Supporting Information Figure 5. ESI-MS of oligonucleotide containing DOB precursor.

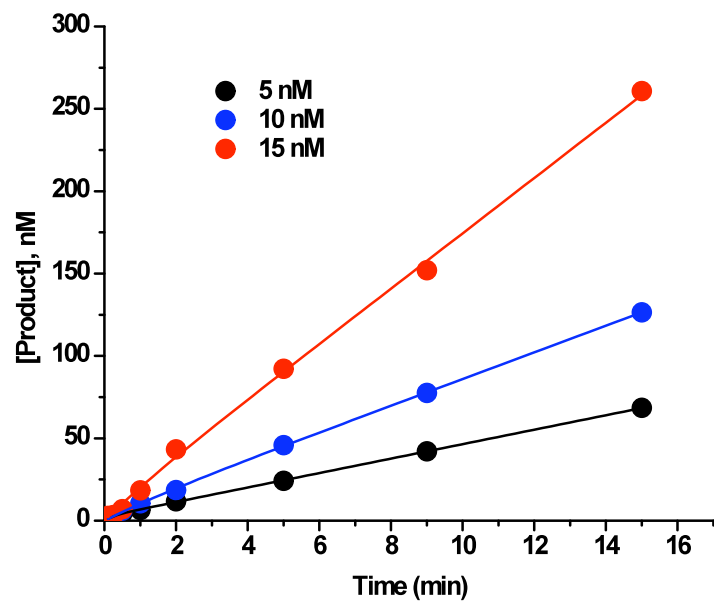

**Supporting Information Figure 6.** Active site titration of Pol  $\beta$  (5 nM, 10 nM, 15 nM) using  $3'$ - $^{32}$ P-2 (500 nM) as substrate.

A

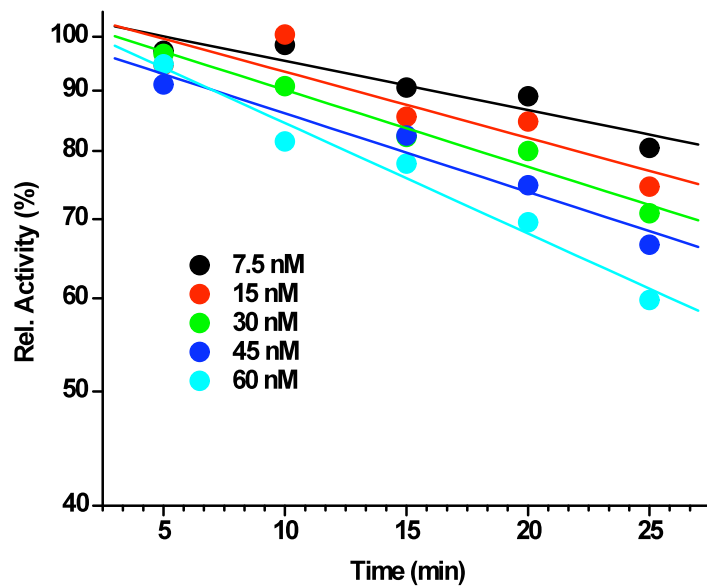

B

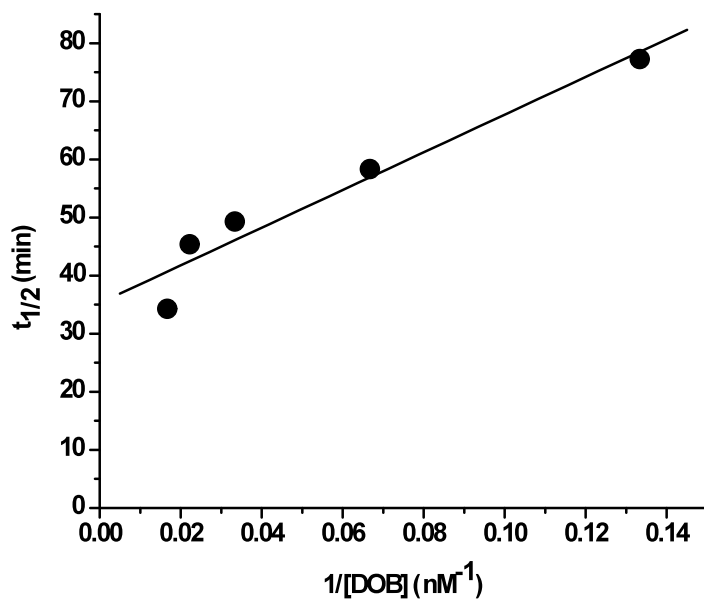

**Supporting Information Figure 7.** Kinetic analysis #1 of irreversible inhibition of Pol  $\beta$  by DOB (**1**). (A) Effect of increasing [DOB] (**1**) on Pol  $\beta$  (7.5 nM) lyase reaction of AP (3'-<sup>32</sup>P-**2**, 500 nM). (B) Half-life of Pol  $\beta$  inactivation as a function of [DOB].

A

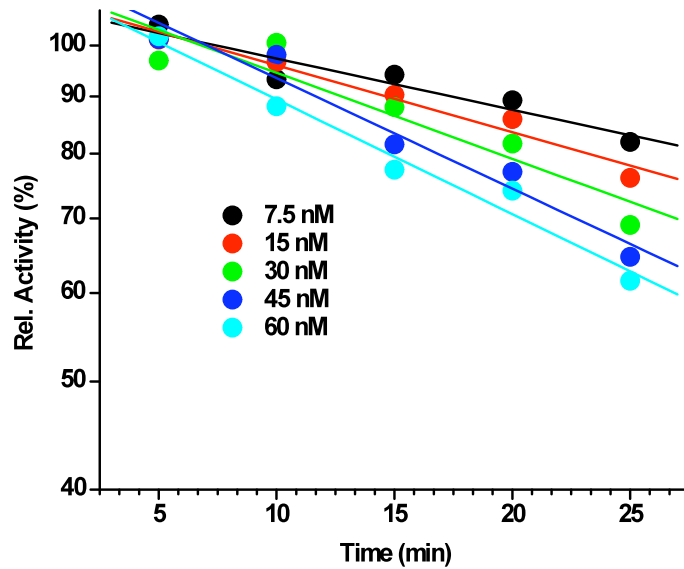

B

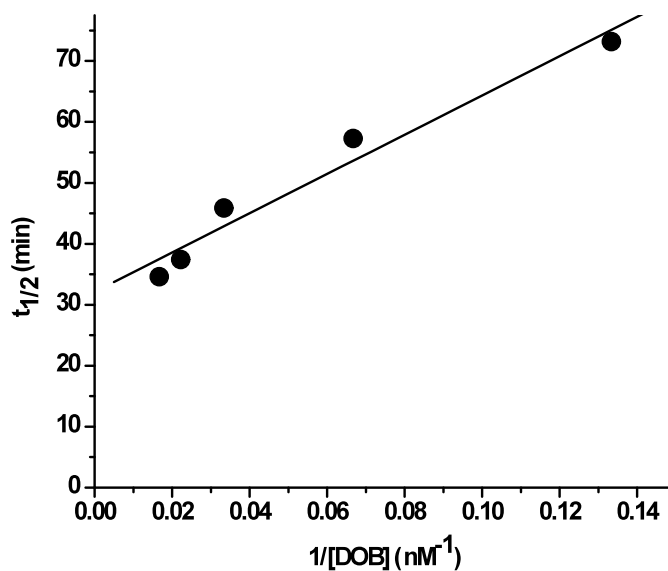

**Supporting Information Figure 8.** Kinetic analysis #2 of irreversible inhibition of Pol  $\beta$  by DOB (**1**). (A) Effect of increasing [DOB] (**1**) on Pol  $\beta$  (7.5 nM) lyase reaction of AP (3'- $^{32}$ P-2, 500 nM). (B) Half-life of Pol  $\beta$  inactivation as a function of [DOB].

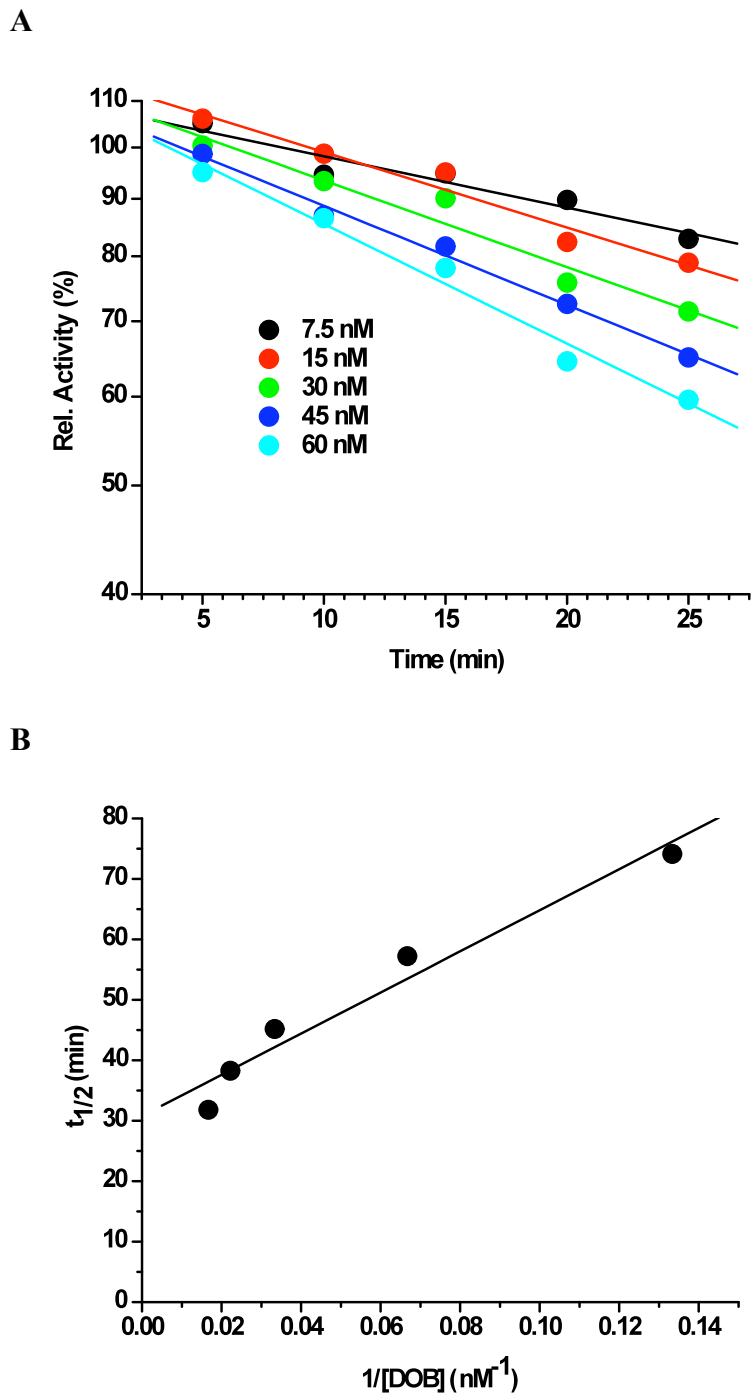

**Supporting Information Figure 9.** Kinetic analysis #3 of irreversible inhibition of Pol  $\beta$  by DOB (**1**). (A) Effect of increasing [DOB] (**1**) on Pol  $\beta$  (7.5 nM) lyase reaction of AP ( $3'$ - $^{32}$ P-**2**, 500 nM). (B) Half-life of Pol  $\beta$  inactivation as a function of [DOB].



A

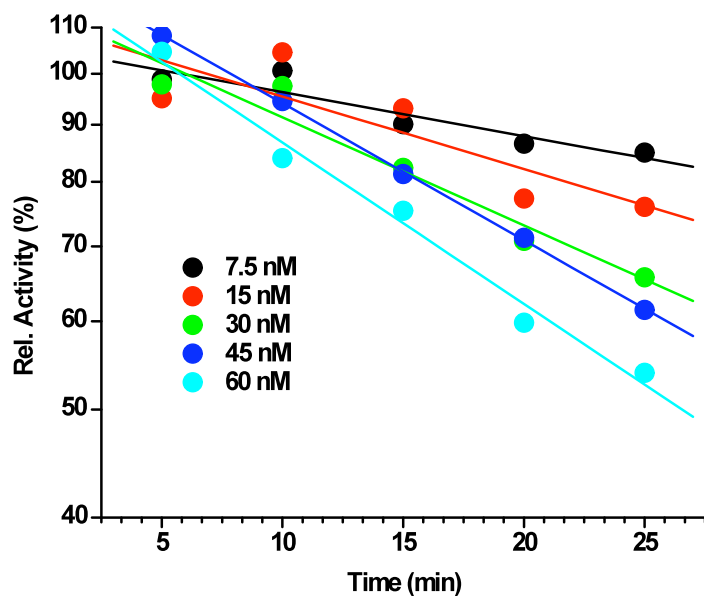

B

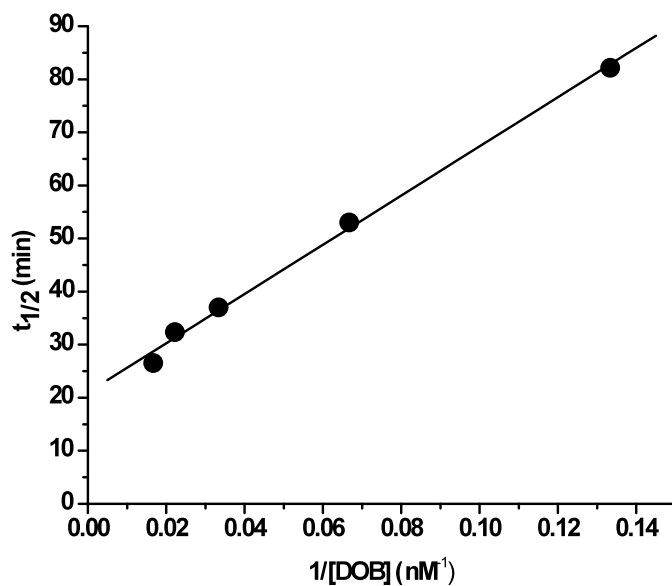

**Supporting Information Figure 10.** Kinetic analysis #4 of irreversible inhibition of Pol  $\beta$  by DOB (**1**). (A) Effect of increasing [DOB] (**1**) on Pol  $\beta$  (7.5 nM) lyase reaction of AP ( $3'$ - $^{32}$ P-2, 500 nM). (B) Half-life of Pol  $\beta$  inactivation as a function of [DOB].

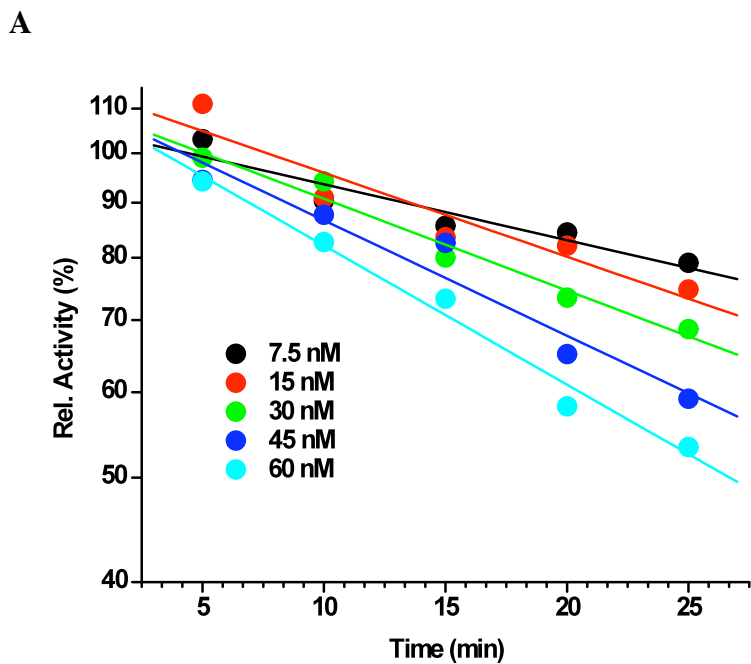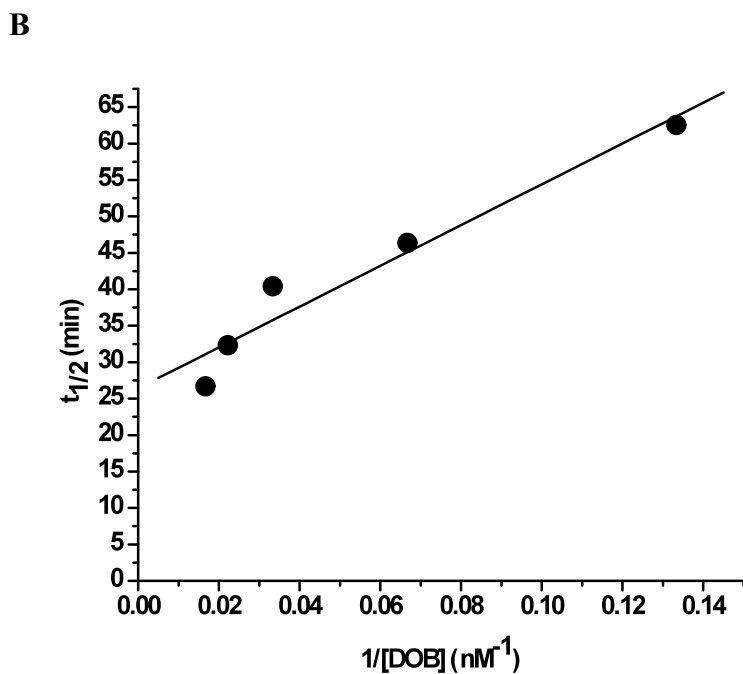

**Supporting Information Figure 11.** Kinetic analysis #5 of irreversible inhibition of Pol  $\beta$  by DOB (**1**). (A) Effect of increasing [DOB] (**1**) on Pol  $\beta$  (7.5 nM) lyase reaction of AP (3'-<sup>32</sup>P-**2**, 500 nM). (B) Half-life of Pol  $\beta$  inactivation as a function of [DOB].

**Supporting Information Table 1.** Summary of individual kinetic analyses of irreversible inhibition of Pol  $\beta$  by DOB (1).

| Experiment                                                                                 | 1<br>(Figure S7)     | 2<br>(Figure S8)     | 3<br>(Figure S9)     | 4<br>(Figure S10)    | 5<br>(Figure S11)    | 6<br>(Figure 2)*     |
|--------------------------------------------------------------------------------------------|----------------------|----------------------|----------------------|----------------------|----------------------|----------------------|
| $K_I$ (nM)                                                                                 | 9.2                  | 10.0                 | 9.1                  | 22.1                 | 10.6                 | 15.7                 |
| $k_{\text{inact}}$ ( $\text{s}^{-1}$ )                                                     | $3.3 \times 10^{-4}$ | $3.6 \times 10^{-4}$ | $3.8 \times 10^{-4}$ | $5.5 \times 10^{-4}$ | $4.4 \times 10^{-4}$ | $5.0 \times 10^{-4}$ |
| $K_I = 12.8 \pm 5.2$ nM, $k_{\text{inact}} = 4.2 \pm 0.9 \times 10^{-4}$ $\text{s}^{-1}$ . |                      |                      |                      |                      |                      |                      |

\*See main text for this kinetic plot.

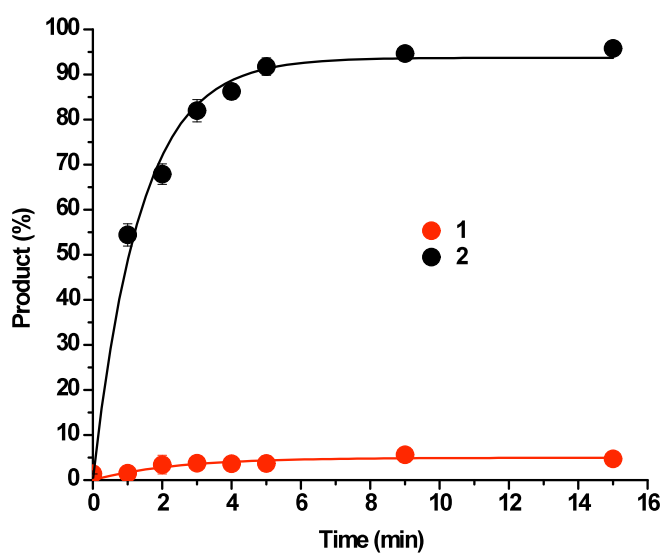

**Supporting Information Figure 12.** Time course experiment of Pol  $\beta$  (5 nM) lyase reaction with DOB ( $3'$ - $^{32}\text{P}$ -1, 200 nM) and AP ( $3'$ - $^{32}\text{P}$ -2, 200 nM).

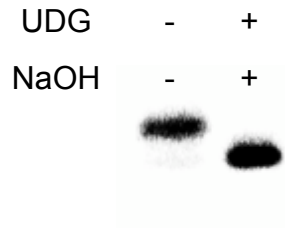

**Supporting Information Figure 13.** Demonstration of completeness of UDG preparation of **1**.  $3'$ - $^{32}\text{P}$ -**1** was treated with UDG and then NaOH.
